# Supplementary material for: Identification of GPX4 as a therapeutic target for lung adenocarcinoma after EGFR-TKI resistance
Source: PubMed Central journal article supplement — Transl Lung Cancer Res. 2022 May;11(5):786–801. doi: 10.21037/tlcr-22-318 (PMC9186177; doi:10.21037/tlcr-22-318), 2022-05
Supplement: tlcr-11-05-786-supplementary.pdf [file tlcr-11-05-786-supplementary.pdf]

**Table S1** Ferroptosis-related factors

| Gene           | Protein                                               | Function                                                                                                                                                       |
|----------------|-------------------------------------------------------|----------------------------------------------------------------------------------------------------------------------------------------------------------------|
| <i>ABCC1</i>   | ATP Binding Cassette Subfamily C Member 1             | Mediates the export of organic anions and drugs from the cytoplasm                                                                                             |
| <i>ACACA</i>   | Acetyl-CoA carboxylase 1                              | Catalyzes acetyl-CoA to malonyl-CoA                                                                                                                            |
| <i>ACO1</i>    | Cytoplasmic aconitate hydratase                       | Bifunctional iron sensor                                                                                                                                       |
| <i>ACSF2</i>   | Acyl-CoA synthetase family member 2                   | Catalyzes the initial reaction in fatty acid metabolism                                                                                                        |
| <i>ACSL3</i>   | Acyl-CoA synthetase long chain family member 3        | Catalyzes the conversion of long-chain fatty acids into fatty acyl-CoAs                                                                                        |
| <i>ACSL4</i>   | Acyl-CoA synthetase long-chain family member 4        | Converts long-chain fatty acids into acyl-CoA                                                                                                                  |
| <i>AKR1C1</i>  | Aldo-keto reductase family 1 member C1                | Catalyzes ketosteroids to hydroxysteroids                                                                                                                      |
| <i>CARS</i>    | Cysteinyl-tRNA synthetase                             | Catalyzes the ligation of Cys (ATP-dependent) to transfer RNA(tRNA)                                                                                            |
| <i>CBS</i>     | Cystathionine-β-synthase                              | Catalyzes L-homocysteine to L-cysteine                                                                                                                         |
| <i>CISD1</i>   | CDGSH iron-sulfur domain 1                            | Participates in Fe-S cluster shuttling and redox reactions                                                                                                     |
| <i>CS</i>      | Citrate synthase                                      | Catalyzes the first step of the citric acid cycle                                                                                                              |
| <i>FADS2</i>   | Acyl-CoA 6-desaturase                                 | Participates in the biosynthesis of highly unsaturated fatty acids                                                                                             |
| <i>FANCD2</i>  | Fanconi anemia group D2 protein                       | Is involved in DNA damage repair and maintaining chromosome stability                                                                                          |
| <i>FDFT1</i>   | Squalene synthase                                     | Catalyzes the production of the squalene                                                                                                                       |
| <i>FTH1</i>    | Ferritin heavy chain                                  | intracellular iron storage subunit                                                                                                                             |
| <i>G6PD</i>    | Glucose-6-phosphate 1-dehydrogenase                   | Facilitates reduced form of nicotinamide adenine dinucleotide phosphate (NADPH) reduction and pentose phosphate for synthesis of fatty acids and nucleic acids |
| <i>GCLC</i>    | Glutamate-cysteine ligase catalytic subunit           | Is involved in glutathione biosynthesis                                                                                                                        |
| <i>LOX</i>     | Lysyl Oxidase                                         |                                                                                                                                                                |
| <i>GLS2</i>    | Glutaminase 2                                         | Is involved in the regulation of glutamine catabolism                                                                                                          |
| <i>GOT1</i>    | Glutamic-Oxaloacetic Transaminase 1                   | Is involved in the biosynthesis of glutamate                                                                                                                   |
| <i>GPX4</i>    | Glutathione Peroxidase 4                              | Essential antioxidant peroxidase                                                                                                                               |
| <i>HMGR</i>    | 3-hydroxy-3-methylglutaryl-coenzyme A reductase       | Catalyzes the synthesis of mevaleric acid                                                                                                                      |
| <i>HMOX1</i>   | Heme Oxygenase 1                                      | Catalyzes the degradation of heme to biliverdin                                                                                                                |
| <i>HSBP1</i>   | Heat Shock Factor Binding Protein 1                   | Negative regulator of the heat shock response                                                                                                                  |
| <i>IREB2</i>   | Iron Responsive Element Binding Protein 2             | RNA-binding protein that binds to Iron-responsive elements (IREs). Binding to the IRE element in ferritin results in the repression of its mRNA translation    |
| <i>KEAP1</i>   | Kelch Like Epichlorohydrin (ECH)-associated Protein 1 | Targeting NFE2L2/NRF2 regulates the oxidative stress response                                                                                                  |
| <i>LPCAT3</i>  | Lysophosphatidylcholine Acyltransferase 3             | Catalyzes fatty acid chain transfer to 1-acyl lysophospholipids to form various classes of phospholipids                                                       |
| <i>MIR137</i>  | –                                                     | Regulates ferroptosis by targeting the glutamine transporter, SLC1A5                                                                                           |
| <i>NCOA4</i>   | Nuclear Receptor Coactivator 4                        | Ligand-independent co-activator of the peroxisome proliferator-activated receptor (PPAR) gamma                                                                 |
| <i>NFS1</i>    | Cysteine desulfurase                                  | Is involved in the synthesis of iron-sulfur clusters by using sulfur from cysteine                                                                             |
| <i>NOX1</i>    | NADPH Oxidase 1                                       | a pyridine nucleotide-dependent oxidoreductase that generates superoxide                                                                                       |
| <i>NQO1</i>    | NAD(P)H Quinone Dehydrogenase 1                       | A quinone reductase                                                                                                                                            |
| <i>NFE2L2</i>  | NFE2-like BZIP Transcription Factor 2                 | Key transcription factor in the response to oxidative stress                                                                                                   |
| <i>PEBP1</i>   | Phosphatidylethanolamine-binding protein 1            | Phosphatidylethanolamine binding protein                                                                                                                       |
| <i>PGD</i>     | Phosphogluconate Dehydrogenase                        | Catalyzes the oxidative decarboxylation of 6-phosphate gluconate                                                                                               |
| <i>PHKG2</i>   | Phosphorylase Kinase Catalytic Subunit Gamma 2        | Activation of glycogen phosphorylase and mediates glycogen breakdown                                                                                           |
| <i>SLC1A5</i>  | Solute Carrier Family 1 Member 5                      | Sodium-dependent amino acids transporter                                                                                                                       |
| <i>SLC7A11</i> | Solute Carrier Family 7 Member 11                     | Specific binding to the anionic form of cystine and glutamate                                                                                                  |
| <i>SQLE</i>    | Squalene Epoxidase                                    | Rate-limiting enzyme in steroid biosynthesis                                                                                                                   |
| <i>STEAP3</i>  | Metalloreductase STEAP3                               | Reduces Fe <sup>3+</sup> to Fe <sup>2+</sup>                                                                                                                   |
| <i>TFRC</i>    | Transferrin Receptor                                  | Cellular uptake of iron                                                                                                                                        |
| <i>ZEB1</i>    | Zinc Finger E-Box Binding Homeobox 1                  | Transcriptional repressor                                                                                                                                      |

**Table S2** Copy number variation of ferroptosis-related genes in LUAD from TCGA data

| Gene           | CNV rate | CNV type                             |
|----------------|----------|--------------------------------------|
| <i>SQLE</i>    | 10.71%   | Amplification: 51/51                 |
| <i>FDFT1</i>   | 9.24%    | Amplification: 1/44                  |
| <i>TFRC</i>    | 4.62%    | Amplification: 13/22; Deletion: 9/22 |
| <i>AKR1C1</i>  | 3.78%    | Amplification: 14/18; Deletion: 4/18 |
| <i>LPCAT3</i>  | 3.15%    | Amplification: 9/15; Deletion: 6/15  |
| <i>NFS1</i>    | 2.52%    | Amplification: 12/12                 |
| <i>GPX4</i>    | 2.52%    | Amplification: 3/12; Deletion: 9/12  |
| <i>GLS2</i>    | 2.52%    | Amplification: 12/12                 |
| <i>ACSF2</i>   | 2.31%    | Amplification: 11/11                 |
| <i>CS</i>      | 2.10%    | Amplification: 10/10                 |
| <i>PGD</i>     | 1.89%    | Amplification: 7/9; Deletion: 2/9    |
| <i>HSBP1</i>   | 1.89%    | Amplification: 1/9; Deletion: 8/9    |
| <i>ACO1</i>    | 1.89%    | Amplification: 4/9; Deletion: 5/9    |
| <i>ACACA</i>   | 1.89%    | Amplification: 9/9                   |
| <i>NFE2L2</i>  | 1.68%    | Amplification: 8/8                   |
| <i>MIR137</i>  | 1.68%    | Amplification: 2/8; Deletion: 6/8    |
| <i>KEAP1</i>   | 1.68%    | Deletion: 8/8                        |
| <i>STEAP3</i>  | 1.47%    | Amplification: 7/7                   |
| <i>PHKG2</i>   | 1.47%    | Amplification: 7/7                   |
| <i>SLC1A5</i>  | 1.26%    | Amplification: 5/6; Deletion: 1/6    |
| <i>HMOX1</i>   | 1.26%    | Amplification: 4/6; Deletion: 2/6    |
| <i>ZEB1</i>    | 1.05%    | Amplification: 5/5                   |
| <i>PEBP1</i>   | 1.05%    | Amplification: 3/5; Deletion: 2/5    |
| <i>HMGCR</i>   | 1.05%    | Amplification: 2/5; Deletion: 3/5    |
| <i>GCLC</i>    | 1.05%    | Amplification: 4/5; Deletion: 1/5    |
| <i>LOX</i>     | 0.84%    | Amplification: 1/4; Deletion: 3/4    |
| <i>IREB2</i>   | 0.84%    | Amplification: 4/4                   |
| <i>FADS2</i>   | 0.84%    | Amplification: 4/4                   |
| <i>CISD1</i>   | 0.84%    | Amplification: 2/4; Deletion: 2/4    |
| <i>CBS</i>     | 0.84%    | Amplification: 3/4; Deletion: 1/4    |
| <i>SLC7A11</i> | 0.63%    | Amplification: 2/3; Deletion: 1/3    |
| <i>NQO1</i>    | 0.63%    | Amplification: 2/3; Deletion: 1/3    |
| <i>NCOA4</i>   | 0.63%    | Amplification: 2/3; Deletion: 1/3    |
| <i>FTH1</i>    | 0.63%    | Amplification: 3/3                   |
| <i>ACSL3</i>   | 0.63%    | Amplification: 3/3                   |
| <i>FANCD2</i>  | 0.42%    | Amplification: 1/2; Deletion: 1/2    |
| <i>GOT1</i>    | 0.21%    | Deletion: 1/1                        |

LUAD, lung adenocarcinoma; TCGA, The Cancer Genome Atlas; CNV, copy number variation

**Table S3** Expression of six ferroptosis-related factors in the tumor tissues of 12 LUAD patients

| Patient                      | GPX4                                    | NRF2                                  | KEAP1                                 | FTH1                                    | ACSL4                                   | LPCAT3                                  |
|------------------------------|-----------------------------------------|---------------------------------------|---------------------------------------|-----------------------------------------|-----------------------------------------|-----------------------------------------|
| Protein (tumor vs. adjacent) |                                         |                                       |                                       |                                         |                                         |                                         |
| Patient #1                   | High                                    | Low                                   | Low                                   | High                                    | High                                    | High                                    |
| Patient #2                   | High                                    | Low                                   | High                                  | Low                                     | Consistent                              | High                                    |
| Patient #3                   | Consistent                              | Low                                   | Low                                   | High                                    | High                                    | High                                    |
| Patient #4                   | High                                    | Low                                   | Low                                   | High                                    | Consistent                              | High                                    |
| Patient #5                   | Low                                     | Low                                   | Low                                   | High                                    | High                                    | High                                    |
| Patient #6                   | High                                    | Low                                   | Low                                   | High                                    | Consistent                              | Low                                     |
| Patient #7                   | High                                    | Low                                   | Low                                   | Consistent                              | High                                    | High                                    |
| Patient #8                   | High                                    | Low                                   | Low                                   | Consistent                              | High                                    | High                                    |
| Patient #9                   | High                                    | Low                                   | Low                                   | High                                    | High                                    | High                                    |
| Patient #10                  | Consistent                              | Low                                   | Low                                   | Low                                     | Consistent                              | Consistent                              |
| Patient #11                  | Low                                     | Low                                   | Low                                   | High                                    | Low                                     | Low                                     |
| Patient #12                  | High                                    | Consistent                            | Low                                   | Low                                     | Consistent                              | High                                    |
| Total                        | High: 8/12; low: 2/12; consistent: 2/12 | High: 0; low: 11/12; consistent: 1/12 | High: 1/12; low: 11/12; consistent: 0 | High: 7/12; low: 3/12; consistent: 2/12 | High: 6/12; low: 1/12; consistent: 5/12 | High: 9/12; low: 2/12; consistent: 1/12 |

LUAD, lung adenocarcinoma.

**Table S4** Cox regression analysis of six ferroptosis-related factors in LUAD

| Variables | Univariate analysis |             |           | Multivariate analysis |             |           |
|-----------|---------------------|-------------|-----------|-----------------------|-------------|-----------|
|           | HR                  | 95% CI      | P value   | HR                    | 95% CI      | P value   |
| GPX4      | 1.540               | 1.137-2.087 | 0.005*    | 1.606                 | 1.174-2.198 | 0.003*    |
| NRF2      | 1.585               | 1.029-2.442 | 0.037*    | 1.944                 | 1.243-3.039 | 0.004*    |
| KEAP1     | 0.751               | 0.539-1.047 | 0.091     | 0.751                 | 0.533-1.059 | 0.102     |
| FTH1      | 0.744               | 0.515-1.076 | 0.116     | 0.753                 | 0.514-1.102 | 0.144     |
| ACSL4     | 0.694               | 0.507-0.949 | 0.022*    | 0.739                 | 0.537-1.016 | 0.063     |
| LPCAT3    | 1.518               | 1.018-2.265 | 0.041*    | 1.371                 | 0.909-2.068 | 0.132     |
| Stage     | 1.621               | 1.407-1.867 | 2.18e-11* | 1.591                 | 1.375-1.842 | 4.48e-10* |
| Age       | 1.007               | 0.991-1.022 | 0.408     |                       |             |           |
| Sex       | 1.059               | 0.783-1.431 | 0.71      |                       |             |           |

\*, P<0.05. LUAD, lung adenocarcinoma; HR, Hazard ratio; CI, confidence interval.

**Table S5** Correlation between GPX4 expression and clinicopathological variables in LUAD patients from tissue microarray

| Clinicopathological variables | n  | GPX4 expression |      | $\chi^2$ value | P value |
|-------------------------------|----|-----------------|------|----------------|---------|
|                               |    | Low             | High |                |         |
| All patients                  | 82 | 39              | 43   |                |         |
| Age (years)                   |    |                 |      | 2.204          | 0.138   |
| <65                           | 39 | 21              | 18   |                |         |
| ≥65                           | 43 | 30              | 13   |                |         |
| Gender                        |    |                 |      | 1.685          | 0.194   |
| Male                          | 39 | 21              | 18   |                |         |
| Female                        | 43 | 17              | 26   |                |         |
| TNM stage <sup>1</sup>        |    |                 |      | 0.006          | 0.941   |
| I-II                          |    | 26              | 13   |                |         |
| III-IV                        |    | 29              | 14   |                |         |
| Lymph node metastasis         |    |                 |      | 0.005          | 0.939   |
| Negative                      |    | 23              | 16   |                |         |
| Positive                      |    | 25              | 18   |                |         |
| Tumor size                    |    |                 |      | 0.339          | 0.560   |
| ≤3 cm                         |    | 13              | 26   |                |         |
| >3 cm                         |    | 17              | 26   |                |         |
| Tissue types                  |    |                 |      | 7.922          | 0.005*  |
| Tumor                         | 62 | 44              | 18   |                |         |
| Adjacent                      | 82 | 39              | 43   |                |         |

\*, P<0.05. LUAD, lung adenocarcinoma; GPX4, Glutathione Peroxidase 4; ADC, adenocarcinoma; TMA, tissue microarray; TNM, tumor-node-metastasis.

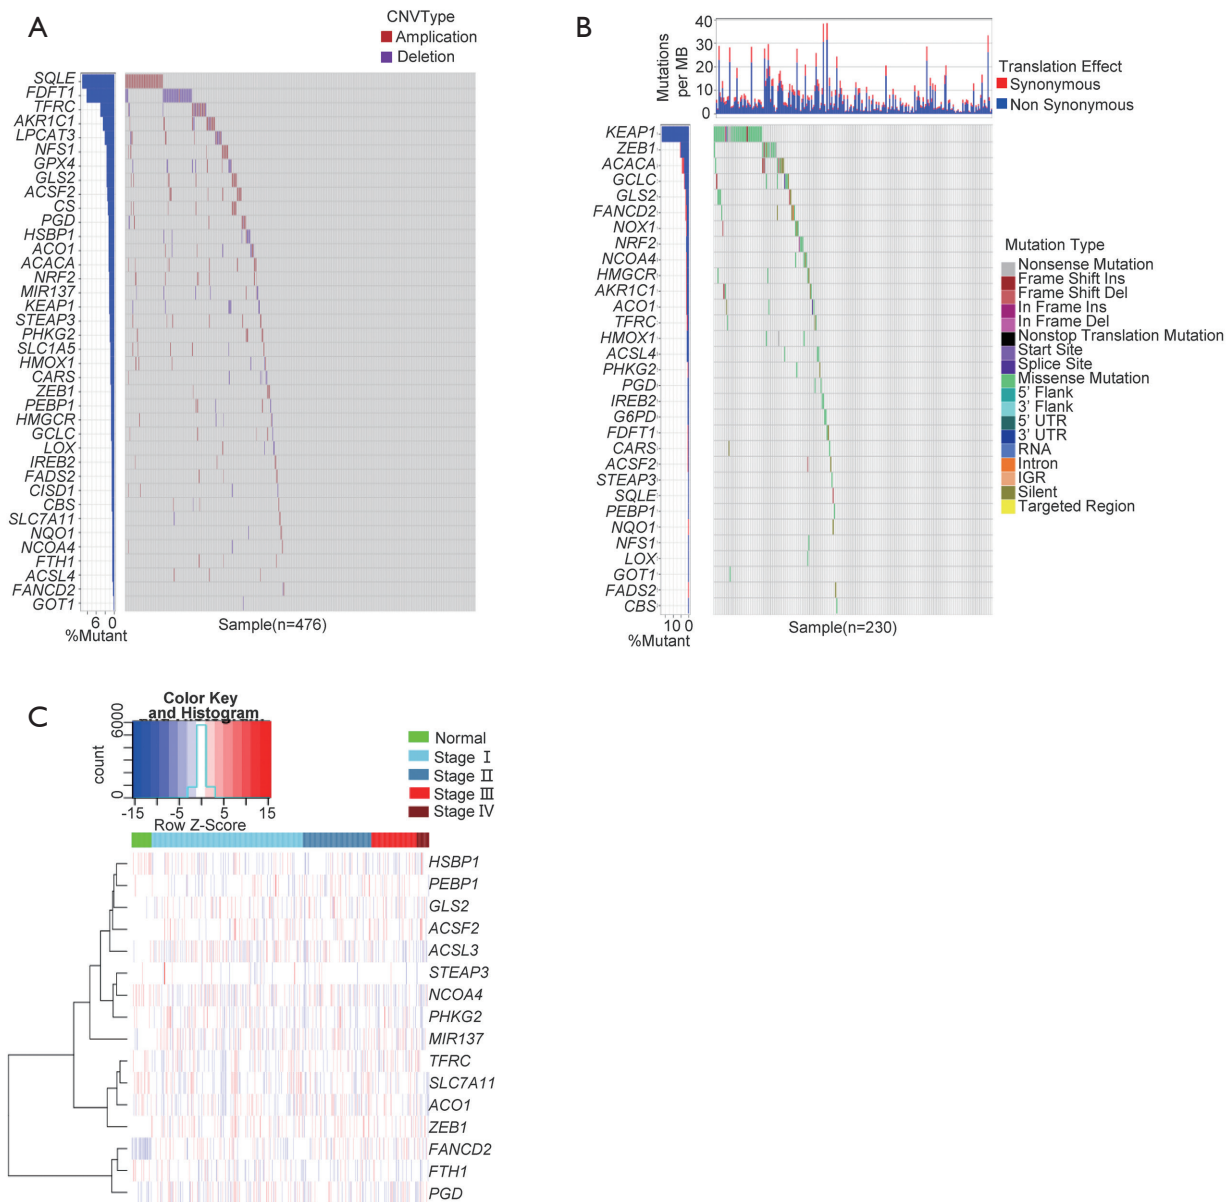

**Figure S1** The expression of ferroptosis-related factors in LUAD. (A) CNV profile of ferroptosis-related genes in clinical LUAD samples. (B) Mutation profile of ferroptosis-related genes in clinical LUAD samples. (C) Promoter region DNA methylation profile of ferroptosis-related genes in clinical LUAD samples. LUAD, lung adenocarcinoma; CNV, copy number variation.

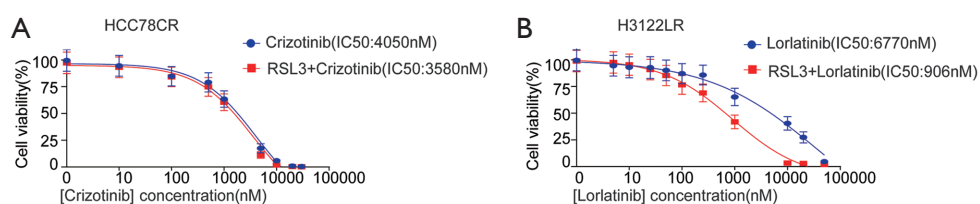

**Figure S2** TKI or/and RSL3 synergistically targeted drug-resistant cells. (A) Proliferation inhibition curves of HCC78CR cells after treatment with crizotinib or RSL3 plus Crizotinib. (B) Proliferation inhibition curves of H3122LR cells after treatment with lorlatinib or RSL3 plus lorlatinib.
